# Supplementary material for: Recent Updates on ALMT Transporters’ Physiology, Regulation, and Molecular Evolution in Plants
Source: MDPI journal article supplement (doi:10.3390/plants12173167), 2023-09-04
Supplement: s1 [file s1]

**Supplementary Table S1.** List of transporters co-localised, co-expressed and/or share domains with ALMTs.

| <b>Gene ID</b> | <b>Description</b>                                                           |
|----------------|------------------------------------------------------------------------------|
| At3g47740      | ABC2 homolog 2 (ABCA3)                                                       |
| At5g06530      | ABC-2 type transporter family protein (ABCG22)                               |
| At3g52310      | ABC transporter G family member 27                                           |
| At3g28960      | Transmembrane amino acid transporter family protein                          |
| At5g59520      | ZRT/IRT-like protein 2 (ZIP2)                                                |
| At2g34960      | cationic amino acid transporter 5 (CAT5)                                     |
| At1g61560      | Seven transmembrane MLO family protein (MLO6)                                |
| At2g21080      | Ras guanine nucleotide exchange factor K                                     |
| At2g30300      | Major facilitator superfamily protein                                        |
| At3g45710      | Major facilitator superfamily protein                                        |
| At3g23430      | putative inorganic phosphate efflux mediator (AtPHO1)                        |
| At5g43350      | phosphate transporter 1;1 (PHT1;1)                                           |
| At1g62280      | SLAC1 homologue 1 (SLAH1)                                                    |
| At5g24030      | putative subunit of SLAH3-SLAH1 anion channel complex (AtSLAH3)              |
| At4g23700      | cation/H <sup>+</sup> exchanger 17 (CHX17)                                   |
| At5g38030      | MATE efflux family protein                                                   |
| At2g17000      | Mechanosensitive ion channel family protein                                  |
| At5g14940      | putative NRT1/PTR subfamily NPF5 transporter (AtNPF5.8)                      |
| At4g08300      | putative MtN21/SIAR/UmamiT-type amino acid transporter (AtUmamiT17)          |
| At3g02850      | putative subunit of Plant-VG voltage-gated potassium cation channel (AtSKOR) |
| At5g23660      | sucrose efflux transporter (AtSWEET12)                                       |
| At5g14880      | putative HAK/KUP/KT cluster-II potassium cation transporter (AtHAK8)         |
| At5g50610      | uncharacterized protein                                                      |
| At4g18540      | uncharacterized protein                                                      |
| AT5G43180      | transmembrane protein of unknown function, DUF599                            |
| At2g28780      | putative membrane protein of unknown function                                |
| At3g09450      | putative membrane protein of unknown function                                |
