# Supplementary material for: Recent Updates on ALMT Transporters’ Physiology, Regulation, and Molecular Evolution in Plants
Source: MDPI journal article supplement (doi:10.3390/plants12173167), 2023-09-04
Supplement: s1 [file s1]

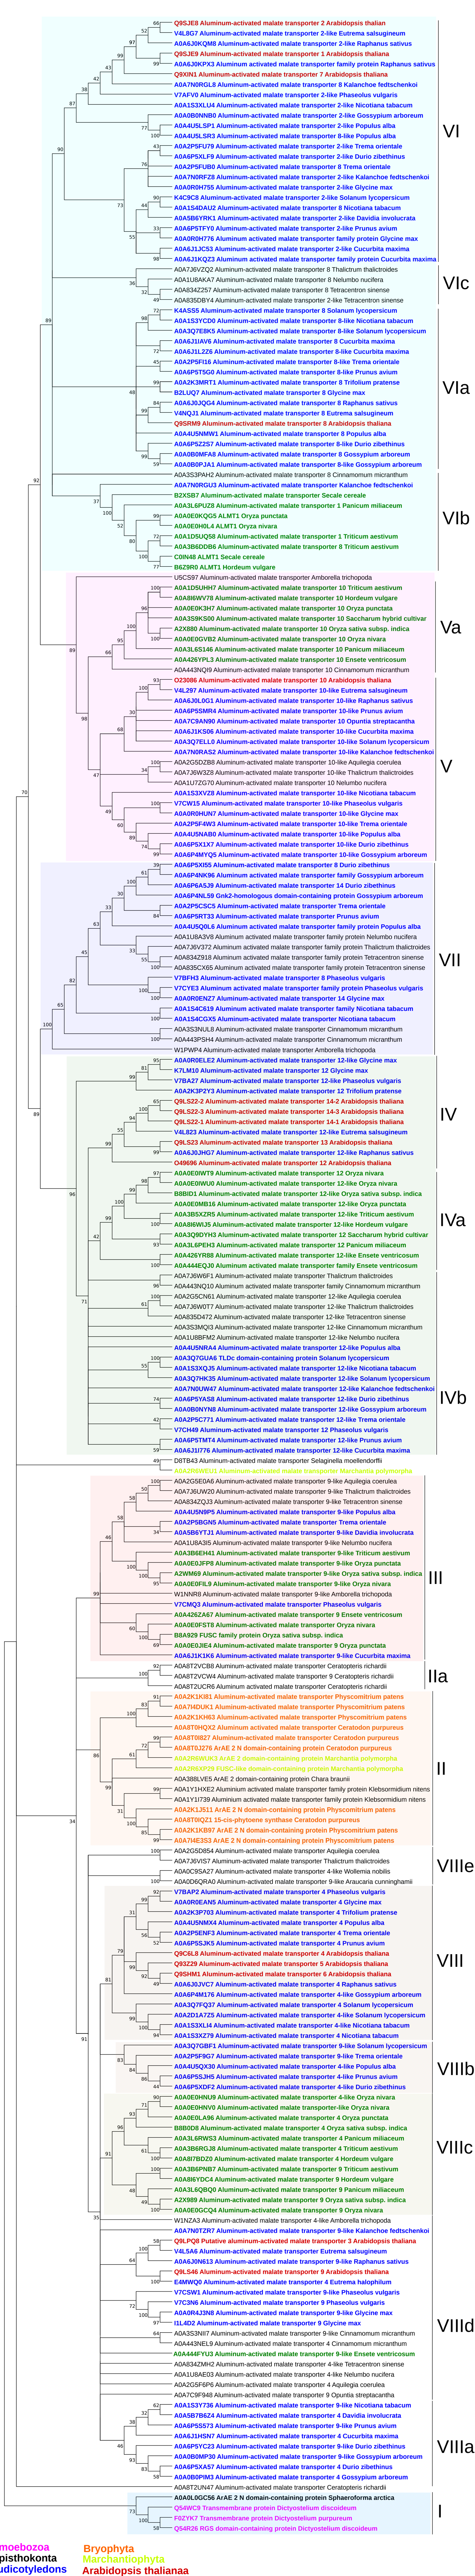

Amoebozoa  
Opisthokonta  
Eudicotyledons  
Monocotyledons

Bryophyta  
Marchantiophyta  
Arabidopsis thaliana
